# Supplementary material for: Effect of Bacterial Amyloid Protein Phenol−Soluble Modulin Alpha 3 on the Aggregation of Amyloid Beta Protein Associated with Alzheimer’s Disease
Source: MDPI journal article supplement (doi:10.3390/biomimetics8060459), 2023-10-01
Supplement: s1 [file s1]

# Supplementary Information

## Effect of Bacterial Amyloid Protein Phenol–Soluble Modulin Alpha 3 on the Aggregation of Amyloid Beta Protein Associated with Alzheimer’s Disease

Bushu Peng, Shaoying Xu, Yue Liang, Xiaoyan Dong \*, Yan Sun \*

Department of Biochemical Engineering, School of Chemical Engineering and Technology, Key Laboratory of Systems Bioengineering and Frontiers Science Center for Synthetic Biology (Ministry of Education), Tianjin University, Tianjin 300350, China.

### CONTENTS

**Table S1 – Table S8** ····· S2–S9

**Figure S1 – Figure S7** ····· S10–S16

**Table S1.** Maximum ThT fluorescence intensity ( $y_{\max}$ ) and lag phase time ( $T_{\text{lag}}$ ) of aggregation kinetics of A $\beta_{40}$  (25  $\mu\text{M}$ ) with different concentrations of PSM $\alpha 3$  monomers. The standard errors of the mean were calculated from three repeats.

| A $\beta_{40}$ : PSM $\alpha 3$ | $y_{\max}$ (a.u.)   | $T_{\text{lag}}$ (h) |
|---------------------------------|---------------------|----------------------|
| 1 : 0                           | 13162.2 $\pm$ 470.6 | 52.8 $\pm$ 1.0       |
| 1 : 0.05                        | 9863.1 $\pm$ 182.5  | 56.6 $\pm$ 0.9       |
| 1 : 0.1                         | 8071.9 $\pm$ 516.8  | 62.3 $\pm$ 2.2       |
| 1 : 0.2                         | 4171.4 $\pm$ 87.1   | 64.7 $\pm$ 1.3       |
| 1 : 0.5                         | 1499.3 $\pm$ 210.9  | 77.1 $\pm$ 6.3       |
| 1 : 1                           | 1027.2 $\pm$ 44.2   | 92.1 $\pm$ 1.2       |

**Table S2.** Maximum ThT fluorescence intensity ( $y_{\max}$ ) and lag phase time ( $T_{\text{lag}}$ ) of aggregation kinetics of A $\beta_{40}$  (25  $\mu\text{M}$ ) incubated without or with PSM $\alpha 3$  seeds. The standard errors of the mean were calculated from three repeats.

| <b>Sample</b>                      | <b><math>y_{\max}</math> (a.u.)</b> | <b><math>T_{\text{lag}}</math> (h)</b> |
|------------------------------------|-------------------------------------|----------------------------------------|
| A $\beta_{40}$                     | $13162.2 \pm 470.6$                 | $52.8 \pm 1.0$                         |
| with PSM $\alpha 3$ seeds at 1 h   | $12700.0 \pm 585.0$                 | $39.1 \pm 2.3$                         |
| with PSM $\alpha 3$ seeds at 2.5 h | $14410.4 \pm 644.1$                 | $33.8 \pm 2.6$                         |
| with PSM $\alpha 3$ seeds at 5 h   | $14311.0 \pm 513.0$                 | $44.4 \pm 1.8$                         |
| with PSM $\alpha 3$ seeds at 24 h  | $13958.4 \pm 459.0$                 | $47.6 \pm 1.4$                         |

**Table S3.** Top 10 binding energies of the PSM $\alpha$ 3m–A $\beta$ <sub>40</sub> complex calculated by molecular docking using Autodock Vina [1].

| Mode | Binding energy (kcal/mol) |
|------|---------------------------|
| 1    | –6.2                      |
| 2    | –5.9                      |
| 3    | –5.3                      |
| 4    | –5.2                      |
| 5    | –5.1                      |
| 6    | –5.1                      |
| 7    | –5.0                      |
| 8    | –4.9                      |
| 9    | –4.6                      |
| 10   | –4.5                      |

**Table S4.** Top 10 binding energies of PSM $\alpha$ 3o and A $\beta$ <sub>40</sub> calculated by molecular docking using Autodock Vina [1].

| Mode | Binding energy (kcal/mol) |
|------|---------------------------|
| 1    | −13.0                     |
| 2    | −12.7                     |
| 3    | −12.7                     |
| 4    | −12.1                     |
| 5    | −11.6                     |
| 6    | −11.5                     |
| 7    | −10.9                     |
| 8    | −10.7                     |
| 9    | −10.7                     |
| 10   | −10.5                     |

**Table S5.** Structural parameters of the A $\beta$ <sub>40</sub> monomer in different systems in the equilibrium state. The standard errors of the mean were calculated from three repeats.

| <b>System</b>                            | <b><math>R_g</math><sup>a</sup> (nm)</b> | <b>SASA<sup>b</sup> (nm<sup>2</sup>)</b> | <b>H-bond<sup>c</sup></b> |
|------------------------------------------|------------------------------------------|------------------------------------------|---------------------------|
| A $\beta$ <sub>40</sub> only             | 1.1 $\pm$ 0.03                           | 38.5 $\pm$ 1.1                           | 22                        |
| A $\beta$ <sub>40</sub> –PSM $\alpha$ 3m | 1.3 $\pm$ 0.03                           | 40.3 $\pm$ 1.7                           | 20                        |
| A $\beta$ <sub>40</sub> –PSM $\alpha$ 3o | 1.3 $\pm$ 0.04                           | 42.1 $\pm$ 1.0                           | 19                        |

<sup>a</sup> Radius of gyration.

<sup>b</sup> Solvent accessible surface area.

<sup>c</sup> Number of intermolecular hydrogen bonds.

**Table S6.** Secondary structure composition of the A $\beta$ <sub>40</sub> monomer in different systems in the equilibrium state.

| <b>System (%)</b>                        | <b>Coil</b> | <b><math>\beta</math>-bridge</b> | <b>Bend</b> | <b>Turn</b> | <b><math>\alpha</math>-helix</b> |
|------------------------------------------|-------------|----------------------------------|-------------|-------------|----------------------------------|
| A $\beta$ <sub>40</sub> only             | 43.9        | 4.5                              | 13.2        | 24.6        | 13.8                             |
| A $\beta$ <sub>40</sub> -PSM $\alpha$ 3m | 29.1        | 0.0                              | 10.5        | 24.1        | 36.3                             |
| A $\beta$ <sub>40</sub> -PSM $\alpha$ 3o | 32.5        | 0.5                              | 11.2        | 23.3        | 32.5                             |

**Table S7.** Binding free energy components of the A $\beta$ <sub>40</sub>–PSM $\alpha$ 3m and A $\beta$ <sub>40</sub>–PSM $\alpha$ 3o systems calculated using the MM–PBSA method [2].

| <b>System<br/>(kJ/mol)</b>                   | $\Delta G_{\text{vdw}}^{\text{a}}$ | $\Delta G_{\text{elec}}^{\text{b}}$ | $\Delta G_{\text{ps}}^{\text{c}}$ | $\Delta G_{\text{nps}}^{\text{d}}$ | $\Delta G_{\text{bind}}^{\text{e}}$ |
|----------------------------------------------|------------------------------------|-------------------------------------|-----------------------------------|------------------------------------|-------------------------------------|
| A $\beta$ <sub>40</sub> –<br>PSM $\alpha$ 3m | –373.5                             | –963.9                              | 1106.5                            | –39.8                              | –270.7                              |
| A $\beta$ <sub>40</sub> –PSM $\alpha$ 3o     | –251.0                             | –1274.7                             | 1418.9                            | –28.6                              | –135.5                              |

<sup>a</sup>  $\Delta G_{\text{vdw}}$  represents the van der Waals hydrophobic energy.

<sup>b</sup>  $\Delta G_{\text{elec}}$  represents electrostatic energy under vacuum.

<sup>c</sup>  $\Delta G_{\text{ps}}$  represents polar solvation energy.

<sup>d</sup>  $\Delta G_{\text{nps}}$  represents nonpolar solvation energy.

<sup>e</sup>  $\Delta G_{\text{bind}}$  represents total binding free energy.



**Table S8.** Energy components of key residues of A $\beta$ <sub>40</sub>–PSM $\alpha$ 3m system.

| System (kJ/mol)         | Residues | $\Delta G_{\text{MM}}^{\text{a}}$ | $\Delta G_{\text{ps}}^{\text{b}}$ | $\Delta G_{\text{nps}}^{\text{c}}$ | $\Delta G_{\text{TOT}}^{\text{d}}$ |
|-------------------------|----------|-----------------------------------|-----------------------------------|------------------------------------|------------------------------------|
| A $\beta$ <sub>40</sub> | ASP-1    | −136.7                            | 118.9                             | −1.9                               | −19.7                              |
|                         | LEU-17   | −10.8                             | −3.1                              | −2.2                               | −16.1                              |
| PSM $\alpha$ 3m         | MET-1    | −269.0                            | 241.3                             | −2.2                               | −29.9                              |
|                         | GLU-2    | 107.7                             | −128.9                            | −0.5                               | −21.7                              |
|                         | PHE-3    | −35.8                             | 14.6                              | −2.3                               | −23.5                              |
|                         | LEU-7    | −24.9                             | 5.1                               | −2.6                               | −22.5                              |
|                         | LEU-14   | −30.5                             | 9.5                               | −2.5                               | −23.5                              |
|                         | PHE-18   | −23.6                             | 7.3                               | −1.7                               | −18.0                              |

<sup>a</sup>  $\Delta G_{\text{MM}} = \Delta G_{\text{elec}} + \Delta G_{\text{vdw}}$ , vacuum energy.

<sup>b</sup>  $\Delta G_{\text{ps}}$  represents polar solvation energy.

<sup>c</sup>  $\Delta G_{\text{nps}}$  represents nonpolar solvation energy.

<sup>d</sup>  $\Delta G_{\text{TOT}}$  represents total contribution of residues to binding free energy.

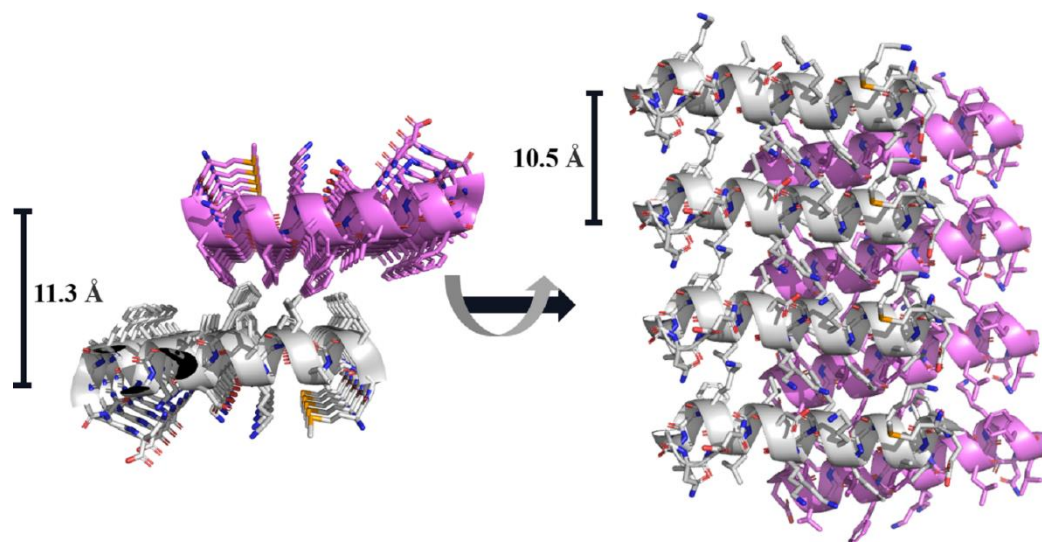

**Figure S1.** Crystal structure of PSMα3 (PBD ID: 5I55) [3].

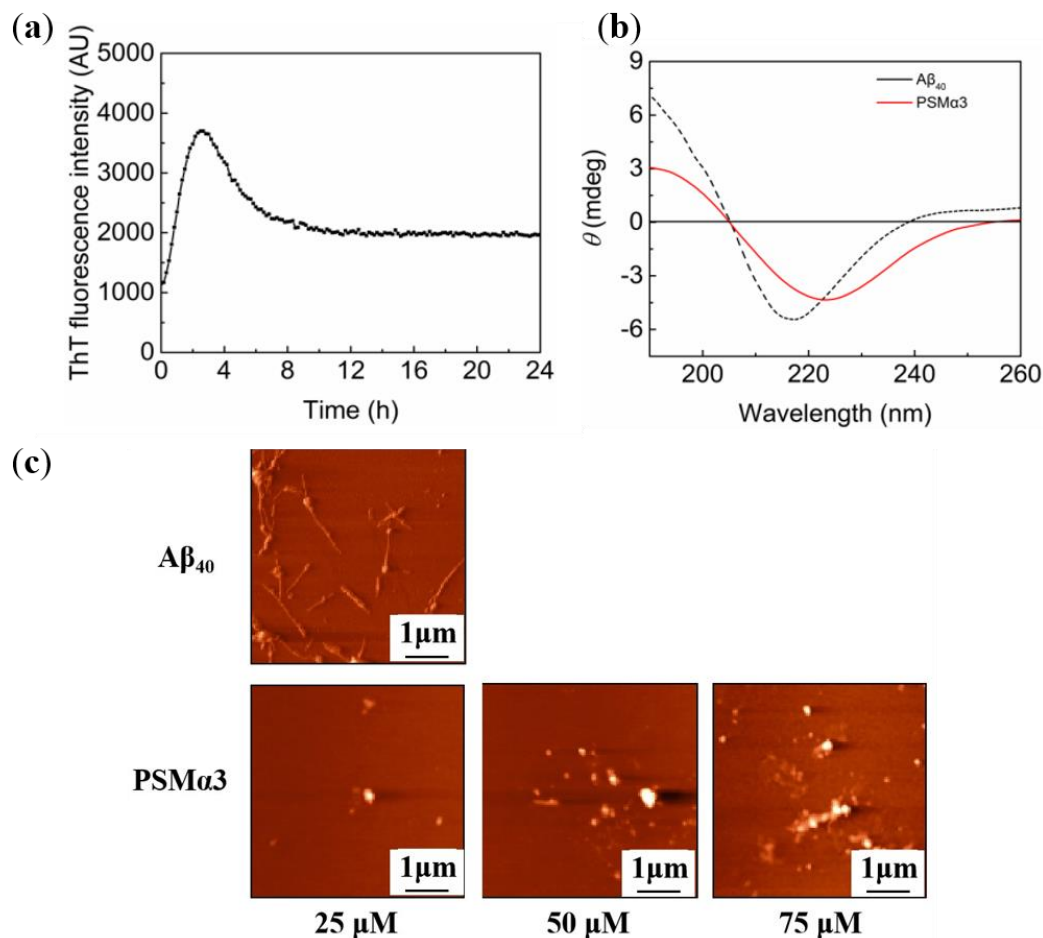

**Figure S2.** Aggregation kinetics of PSM $\alpha 3$ : (a) Aggregation kinetics of PSM $\alpha 3$  (25  $\mu$ M) by ThT fluorescence assays; (b) Far-UV circular dichroism spectra of  $A\beta_{40}$  (25  $\mu$ M) and PSM $\alpha 3$  (25  $\mu$ M) aggregates at 72 h; (c) AFM images of  $A\beta_{40}$  (25  $\mu$ M) and PSM $\alpha 3$  (25  $\mu$ M, 50  $\mu$ M, 75  $\mu$ M) aggregates obtained by incubation at 37  $^{\circ}$ C for 72 h.

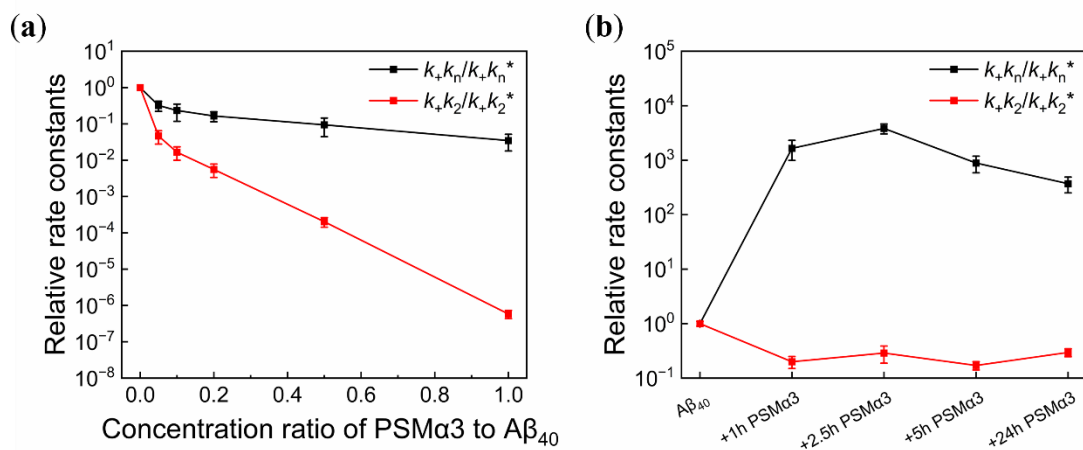

**Figure S3.** Relative kinetic rate constants of Aβ<sub>40</sub> aggregation in the presence of (a) PSMα3 monomers or (b) PSMα3 seeds. The kinetic curve was fitted using the multistep secondary nucleation dominated, unseeded model with both  $k_nk_+$  and  $k_2k_+$  as free-fitting parameters [4]. An asterisk (\*) denotes rate constants from Aβ<sub>40</sub> aggregation in the absence of PSMα3. Error bars are standard deviations (s.d.) calculated from three repeats.

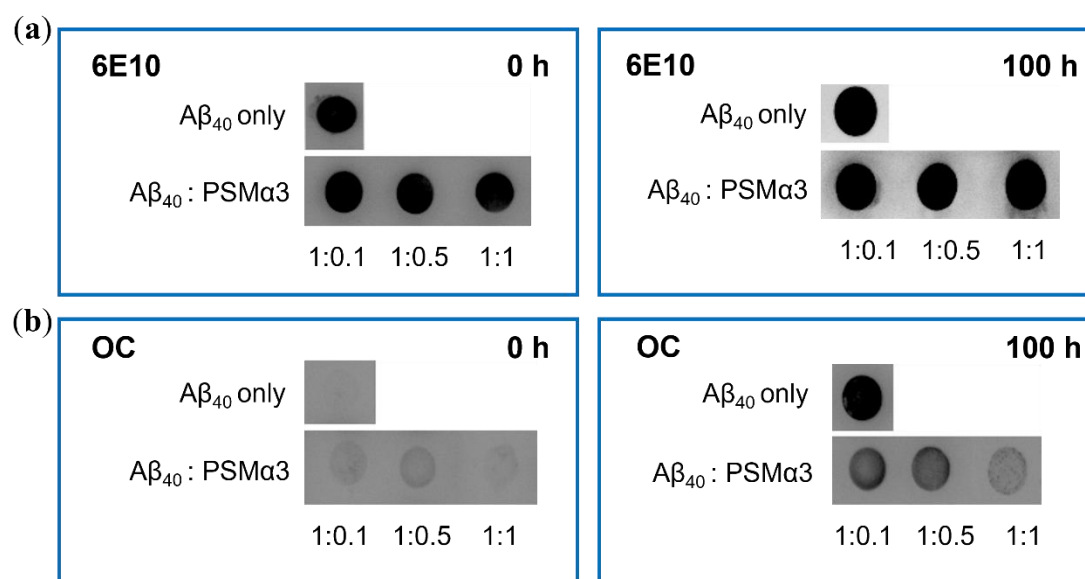

**Figure S4.** Effects of  $PSM\alpha 3$  monomers at different concentrations on the formation of  $A\beta_{40}$  (25  $\mu M$ ) fibrils at 0 h and 100 h. (a)  $A\beta_{1-16}$  sequence-specific 6E10 antibody assay for all forms of  $A\beta$  species; (b)  $A\beta$  fibril-specific OC antibody assay.

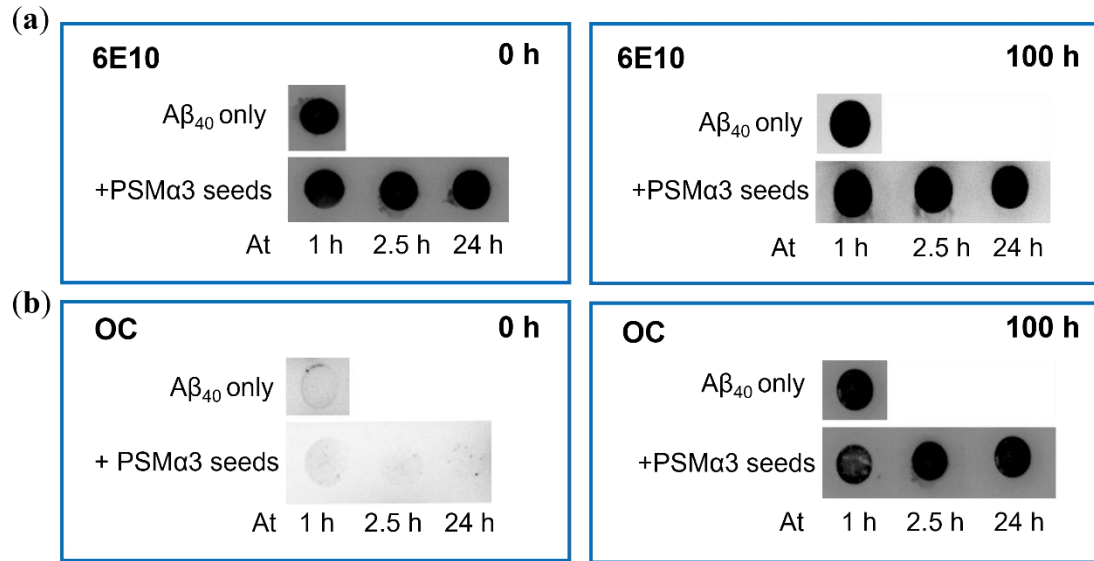

**Figure S5.** Effects of PSM $\alpha$ 3 seeds (5  $\mu$ M) at 1 h, 2.5 h, and 24 h on the formation of A $\beta_{40}$  (25  $\mu$ M) fibrils at 0 h and 100 h. (a) A $\beta_{1-16}$  sequence-specific 6E10 antibody assay for all forms of A $\beta$  species; (b) A $\beta$  fibril-specific OC antibody assay.

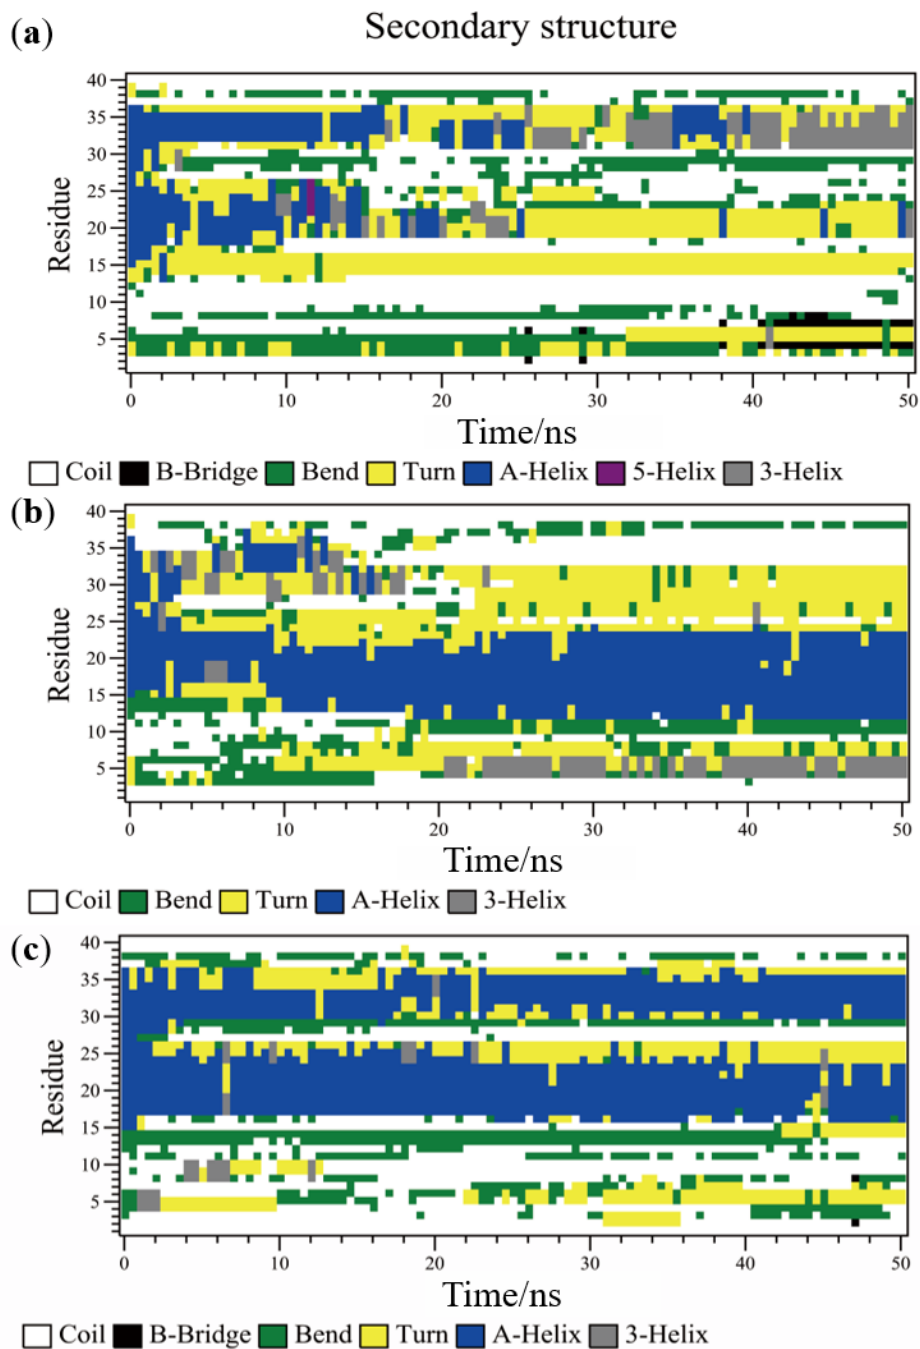

**Figure S6.** The secondary structure components of A $\beta$ <sub>40</sub> during the 50 ns MD simulations in (a) A $\beta$ <sub>40</sub> only, (b) A $\beta$ <sub>40</sub>-PSM $\alpha$ 3m, and (c) A $\beta$ <sub>40</sub>-PSM $\alpha$ 3o systems.

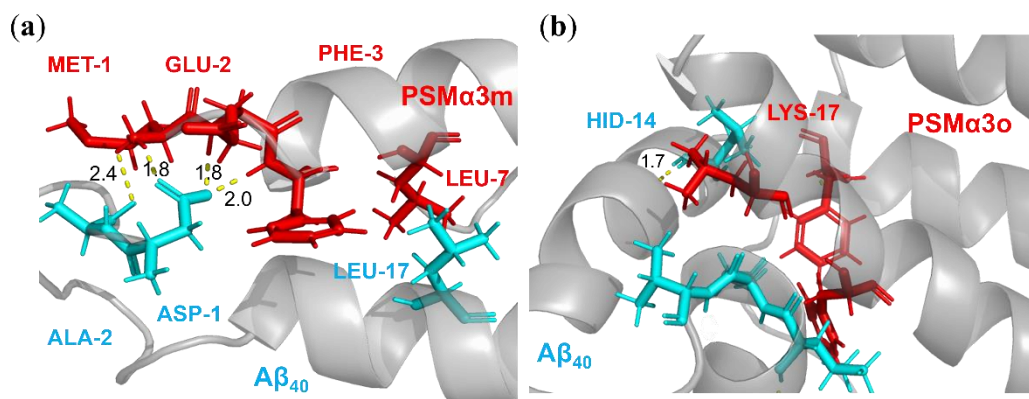

**Figure S7.** H-bonds between the A $\beta$ <sub>40</sub> monomer and (a) PSM $\alpha$ 3m or (b) PSM $\alpha$ 3o. Blue represents residues of A $\beta$ <sub>40</sub>, red represents residues of PSM $\alpha$ 3m and PSM $\alpha$ 3o.

## References

- (1) Trott, O.; Olson, A.J. Software news and update AutoDock Vina: improving the speed and accuracy of docking with a new scoring function, efficient optimization, and multithreading. *Comput Chem.* **2010**, *31* (2), 455–461.
- (2) Kumari, R.; Kumar, R.; Lynn, A. g\_mmpbsa—a GROMACS tool for high-throughput MM–PBSA calculations. *J. Chem. Inf. Model.* **2014**, *54* (7), 1951–1962.
- (3) Tayeb–Fligelman, E.; Tabachnikov, O.; Moshe, A.; Goldshmidt–Tran, O.; Sawaya, M.R.; Coquelle, N.; Colletier, J.P.; Landau, M. The cytotoxic *Staphylococcus aureus* PSM $\alpha$ 3 reveals a cross- $\alpha$  amyloid–like fibril. *Science* **2017**, *355* (6327), 831–833.
- (4) Belsare K.D.; Wu H.; Mondal D.; Bond A.; Castillo E.; Jin J.; Jo H.; Roush A.E.; Pilla K.B.; Sali A.; et al. Soluble TREM2 inhibits secondary nucleation of A $\beta$  fibrillization and enhances cellular uptake of fibrillar A $\beta$ . *Proc. Natl. Acad. Sci. U. S. A.* **2022**, *119* (5), e2114486119.
